# Supplementary material
Source: PubMed Central journal article supplement (PMC6921644)

## *Supporting Information*

### **Bioconversion of xylose to ethylene glycol and glycolate in engineered *Corynebacterium glutamicum***

Seung Soo Lee<sup>1</sup>, Jong-il Choi<sup>2</sup>, Han Min Woo<sup>1\*</sup>

<sup>1</sup>Department of Food Science and Biotechnology, Sungkyunkwan University (SKKU), 2066 Seobu-ro, Jangan-gu, Suwon 16419, Republic of Korea

<sup>2</sup>Department of Biotechnology and Bioengineering, Chonnam National University, 77 Yongbong-ro, Buk-gu, Gwangju 61186, Republic of Korea

\*Corresponding author:

Han Min Woo

Department of Food Science and Biotechnology, Sungkyunkwan University (SKKU),  
2066 Seobu-ro, Jangan-gu, Suwon 16419, Republic of Korea

Tel: +82 31 290 7808; Fax: +82 31 290 7882;

E-mail address: hmwoo@skku.edu (H. M. Woo)

ORCID: 0000-0002-8797-0477

**Table S1.** Oligonucleotides used for gene cloning in this study.

| Name                                  | Relevant characteristics (5' → 3')                                | Source     |
|---------------------------------------|-------------------------------------------------------------------|------------|
| crRNA- <i>iolR</i> - <i>SpeI</i> -fwd | TATactagt <u>AGGTCTTCGAAGAGTTCGGCTGGCATCTACAACAGTAGA</u><br>AATTC | This study |
| crRNA- <i>ald</i> - <i>SpeI</i> -fwd  | TATactagt <u>TGCGGTGCCACGTGCGACCTCACAATCTACAACAGTAGA</u><br>AATTC | This study |
| crRNA- <i>SpeI</i> -rev               | TATactagtATTTAAATAAAAACGAAAGGC                                    | This study |

Note: The restriction enzyme sites were shown as lower cases. Target specific-protospacer regions of the sgRNAs were underlined.

**Table S2.** Single strand oligonucleotides used for the CoryneCR12-STOP

| Name               | Relevant characteristics (5' → 3')                                        | Source     |
|--------------------|---------------------------------------------------------------------------|------------|
| ssODN_ <i>iolR</i> | GCGGTCGAGGTCTTCGAAGAGTTCGGCT <b>Tta</b> CCAAATGGGAGCTTCGGTGGT<br>CATGATGT | This study |
| ssODN_ <i>ald</i>  | ACGTCCGCTGCGGTGCCACGTGCGACCT <b>at</b> CAGAAACTTCACCAGTGACA<br>GGTGAAAT   | This study |

Note: Edited bases were shown as lower cases and stop codon sites were shown in bold.

Figure S1. Time course of growth, xylose consumption and ethylene glycol production in engineered *C. glutamicum* with the *fucO* gene expression

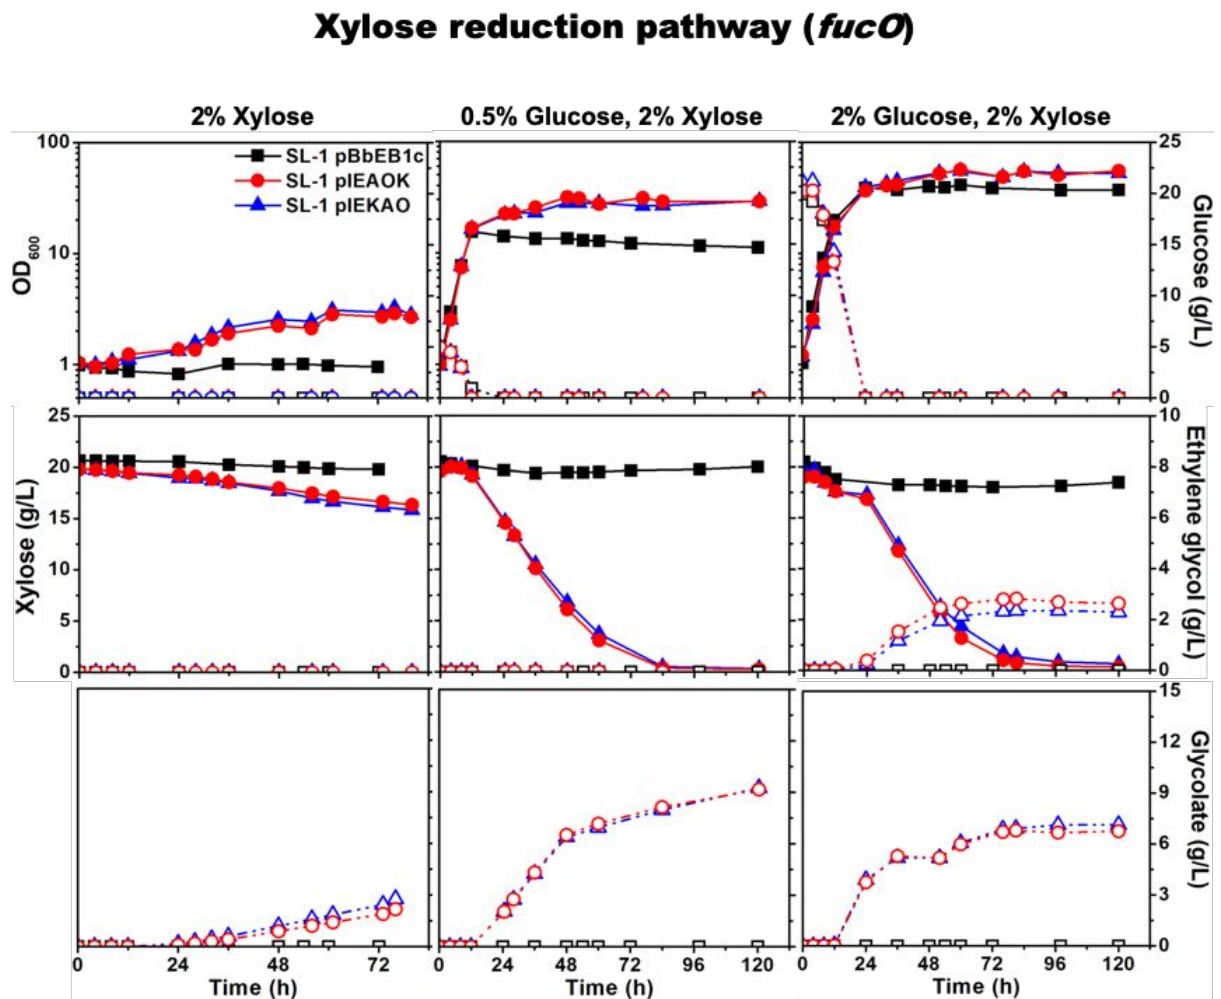

Growth and carbon source consumption in recombinant *C. glutamicum* for production of ethylene glycol. Optical densities at 600 nm ( $OD_{600}$ ; solid symbol; solid line) and glucose (open symbol; dashed line) concentrations [upper row], xylose (solid symbol; solid line) and ethylene glycol (open symbol; dashed line) concentrations [middle row], and glycolate (open symbol; dashed line) concentrations [lower row] in the medium were measured for *C. glutamicum* SL-1 pBbEB1c (black square in A & B), SL-1 pIEAOK (red circle in A) or SL-1 pIEKAO (blue triangle in A). Either xylose (2% wt/vol) as the sole carbon source [left panel], a mixture of xylose (2% wt/vol) and glucose (0.5% wt/vol) [middle panel], or a mixture of xylose (2% wt/vol) and glucose (2% wt/vol) [right panel] in CgXII medium were used. Data represents mean values of triplicate cultivations, and error bars represent standard deviations. See the details in Table 1 for the strain used.

Figure S2. Sequence chromatograms of editing sites at the *iolR* and *ald* gene of *C. glutamicum*.

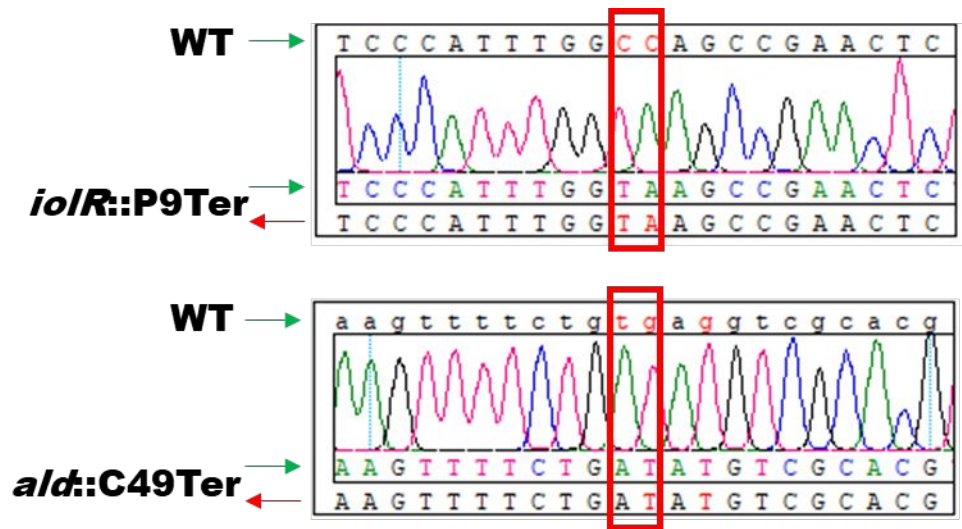

Supplement: ao9b02805_si_001.pdf [file ao9b02805_si_001.pdf]
